# Supplementary material for: Networks of entrepreneurs driving the Triple Helix: two cases of the Dutch energy system
Source: Springer Nature journal article supplement (doi:10.1186/s40604-017-0047-z), 2017-12-01
Supplement: MOESM1 [file 15278956]

## Multilingual abstracts

### Arabic

Jolien Ubacht, [Claudia Werker](#), [Andreas Ligvoet](#)

## Networks of Entrepreneurs Driving the Triple Helix: Two Cases of the Dutch Energy System

شبكات الاعمال المحددة للمراوح الثلاثة : دراسة حالتين من نظام الطاقة الهولندي

ينظر الى المقاولين غالبا على انهم مؤسسات صغيرة وناشطة تتعرض في معاملاتها الى كل المتدخلين. يهدف هذا المقال الى فهم كيف يمكن لمختلف المقاولين تكوين تكتلات وقيادة التغيرات المؤسسية والتكنولوجية في اطار المراحل الثلاثة. يتبنى هذا المقال من الناحية النظرية رؤية اجتماعية للمقاول عبر اعتماد انموذج المراحل الثلاثة . كما يتناول من الناحية العملية مجالا اقتصاديا عالي التنظيم أي مجال الطاقة الهولندي عبر تحليل حالتين لمقاولين تعتمد مشروعاتهم على مصادر الطاقة المتجددة . يهدف هذا المقال الى دراسة كيف يمكن الى المقاول في المجال الخاص والعام والاكاديمي من قيادة تطور انموذج المراحل الثلاثة. تبين النتائج بروز نوعين من النتائج المتعلقة بمجال المقاول والتي تساهم في تطور نظام المراحل الثلاثة. أولا المؤسسات الخاصة والقائمة الذات لا تعكس بالضرورة مجال المقاولات برمتها. ثانيا , تبين ان الشبكات بين مختلف المقاولين هي اكثر شيوعا وتعقيدا مما كان متوقعا وبشكل اكثر تحديدا, نجد ان هناك تطورات متباينة الى حد ما في نظم الطاقة الهولندية. في حين انه في حالة " Aardwarmte Den Haag " تتعاون عدد من الجهات الفاعلة الرئيسية في تحقيق تكنولوجيا واحدة بعينها فانه في حالة " LochemEnergie " يوجد مشروع نهج جديد تدعمه الاعانات. وفي كلتا الحالتين توجد مجموعة متنوعة من المقاولين من القطاع الخاص و العام والاكاديمي تتميز باختلاف أدوارها وأهدافها ومواردها ومعارفها ومستويات سياساتها لقيادة تطور نظمها في مجال الطاقة. يعتمد ذلك في الطرف الراهن على من له القدرة والموارد ليقوم بهذا الدور ويشرك الأطراف الأخرى عند اللزوم. يشترط في المقاولين في هذه المرحلة توفر مهارات معينة بما في ذلك القدرة على الدخول في حوار مع شبكاتهم (المعرفة) , وتحديد الثغرات وجذب وتحفيز مشاركين جدد. يدير المقاولون هذه الشبكات عبر مجموعة كاملة من الجهات الفاعلة والغير المتوقعة وعبر عوامل المحيط التي تؤثر ايضا على بعضها البعض وبالتالي يمكن تعريفها بأنها نظام اجتماعي وتكنولوجي معقد. تتكشف مبادرات تطوير الطاقة المحلية على ضرورة ان يتمتع المقاولون بالمرونة والانفتاح على التغيير التنظيمي. على خلاف ذلك يالتسم عادة عدد كبير من المنظمات مثل البلديات او الشركات الكبيرة المتعددة الجنسيات بدرجة اقل من المرونة قد تفسح المجال لأنشطة مشاريع صغيرة وتدعم الافراد والشركات الناشئة و اكاديميين في إيجاد حلول جديدة. وفي نفس الوقت يلعب المقاولون العموميون

دورا هاما في مجال تحفيز بعث المشاريع وتطوير شبكة المقاولين .يمكن توظيف نتائج هذا العمل التحليلي في دراسة مبادئ مفهوم المراوح الثلاثة في محيط ديناميكي حيث يتطلب الابتكار التكنولوجي خبرات وقدرات مختلف العناصر الفاعلة. وتتمثل وظيفتها ليس فقط في تحديد ادوار وأنواع الاعمال وإنما ايضا في الحصول على الموارد (المعارف والمهارات والإعانات) التي يمكنها المساهمة في هذه المبادرة.

**الكلمات المفتاح** المقاولون- التعقيد - النظم التكنولوجية - منظومة الطاقة - المراوح الثلاثة
